# Supplementary material for: Clonal evolution in liver cancer at single-cell and single-variant resolution
Source: Springer Nature journal article supplement (doi:10.1186/s13045-021-01036-y), 2021-02-02
Supplement: MOESM2 [file 18826192]

## **Supplementary Figures**

**Supplementary Fig. 1** Overview of the single-cell analysis strategy of human HCC.

**Supplementary Fig. 2** Single-cell mixture WES revealed inter-tumor genetic heterogeneity of HCC.

**Supplementary Fig. 3** High quality single-cell mutation data were obtained by target sequencing.

**Supplementary Fig. 4** Single-cell clonal structures of HCC1, HCC2 and HCC9 based on point mutations.

**Supplementary Fig. 5** scRNA-Seq revealed the constituent cell types of HCC.

**Supplementary Fig. 6** scRNA-Seq revealed the inter-tumor and intra-tumor heterogeneity of HCC.

**Supplementary Fig. 7** Schematic representation of major findings in this study.

**a**

| Patient | Gender | Age | Stage       | Tumor size  | PVTT | Cell No.: | Cell No.:    | Cell No.: |
|---------|--------|-----|-------------|-------------|------|-----------|--------------|-----------|
|         |        |     |             |             |      | WES       | scTarget-seq | scRNA-Seq |
| HCC1    | M      | 64  | HCC, II~III | -           | -    | 135       | 96           | 800       |
| HCC2    | M      | 66  | HCC, II     | 10*6*5cm    | -    | 123       | 96           | 800       |
| HCC5    | F      | 77  | HCC, II     | 5*3*3cm     | -    | 145       | -            | 800       |
| HCC8    | M      | 64  | HCC, II     | 4.5*4*3.5cm | √    | 257       | 192          | -         |
| HCC9    | M      | 47  | HCC, II     | 8.6*6*6cm   | -    | 176       | 96           | 800       |

**b**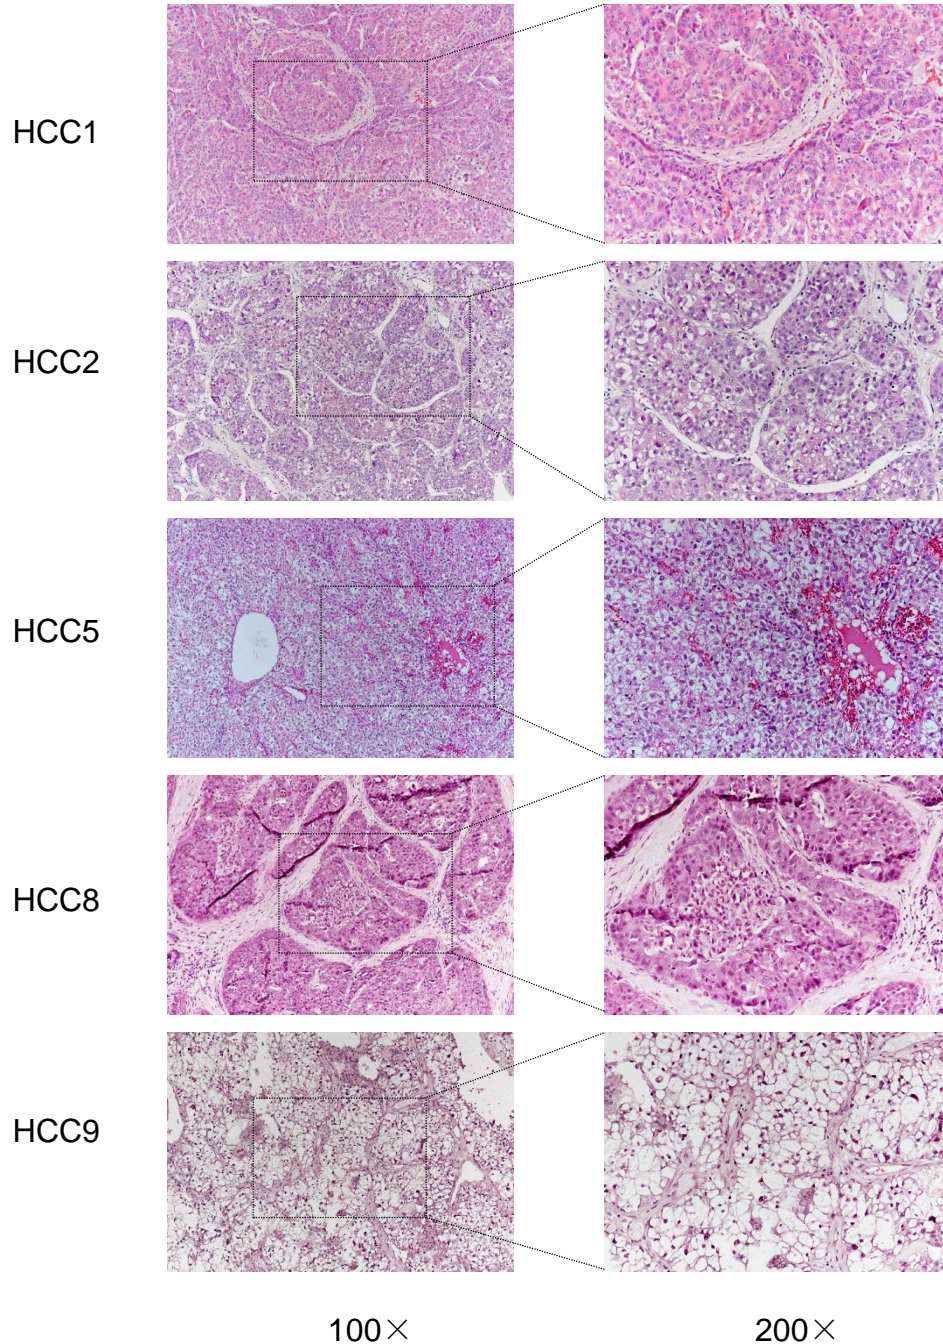

**Supplementary Fig. 1** Overview of the single-cell analysis strategy of human HCC. **a** Patient information and investigation summary. **b** H&E staining of HCC tumor tissues.

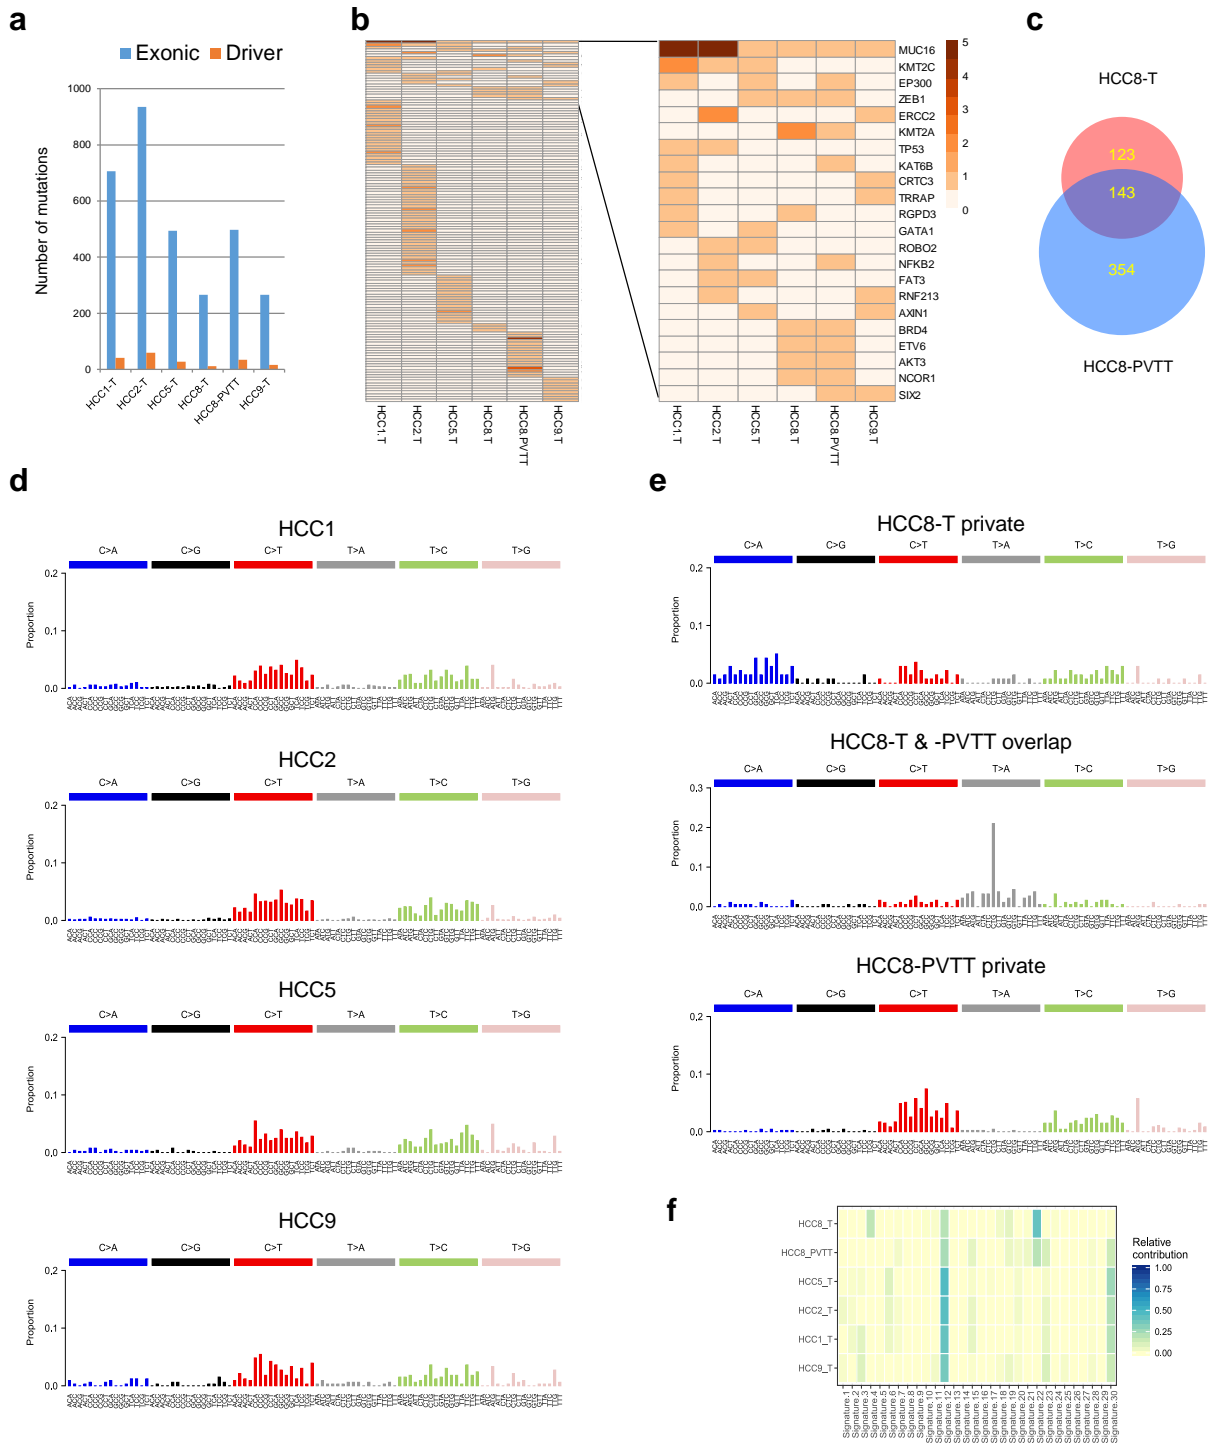

**Supplementary Fig. 2** Single-cell mixture WES revealed inter-tumor genetic heterogeneity of HCC. **a** Number of exonic mutations and mutations on driver genes catalogued in the COSMIC Cancer Gene Census in HCC tumor tissues. **b** Heatmap showing the numbers of exonic mutations on driver genes by single-cell mixture WES. **c** Overlap of exonic mutations in primary tumor and PVTT of HCC8. **d** Mutational spectra of genetic variations in tumor tissues from HCC1, HCC2, HCC5 and HCC9. **e** Mutational spectra of genetic variations shared or privately detected in primary tumor and PVTT of HCC8. **f** Contributions of COSMIC signatures to the HCC mutational spectra.

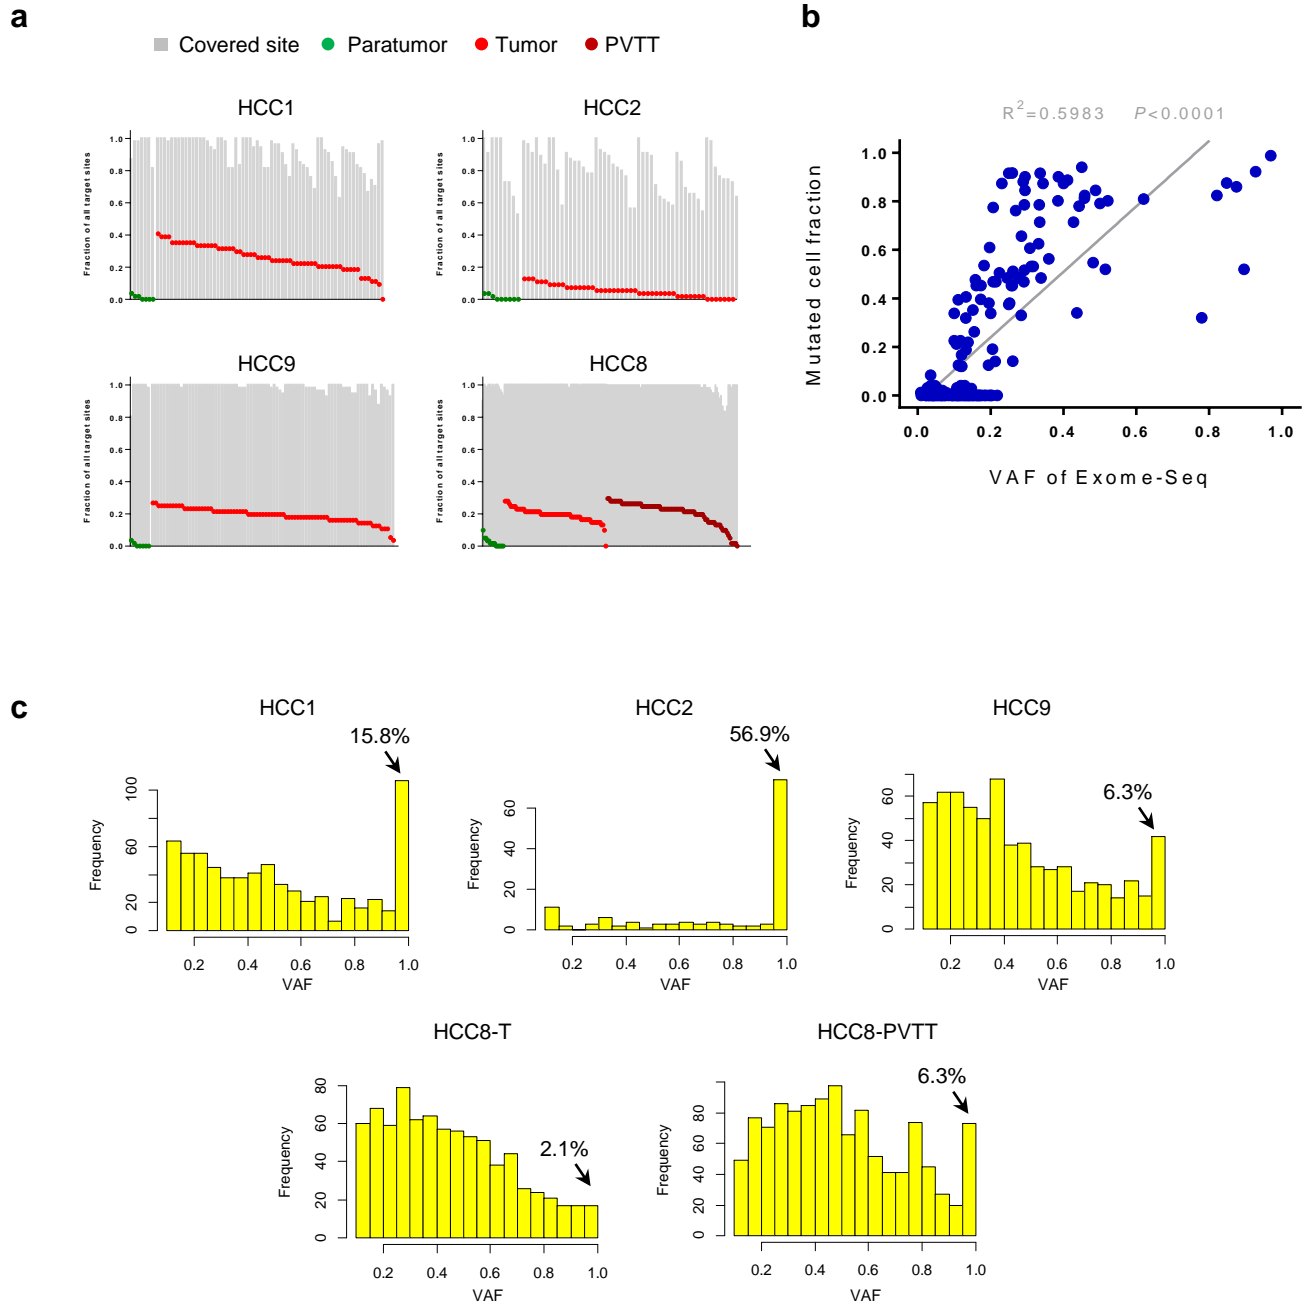

**Supplementary Fig. 3** High quality single-cell mutation data were obtained by target sequencing. **a** Proportions of covered and mutated sites in each single cell in the 4 HCC patients. **b** Correlation plot between mutated cell fractions in single-cell target sequencing and WES-derived VAF values of mutations from HCC. Each dot represented a mutation, and the grey line represented linear regression with  $R^2$  and  $P$  value shown. Please note that the copy number changes of target sites will cause deviations from standard correlation. **c** Histograms showing the distributions of VAF values in single cells among each HCC sample, after filtering those values below 0.1. The percentage of variations with VAF values between 0.95~1 were shown in each sample for allelic drop-out (ADO) assessment. Except for HCC2 with rate of 56.9%, all samples showed good results with low ADO rate.

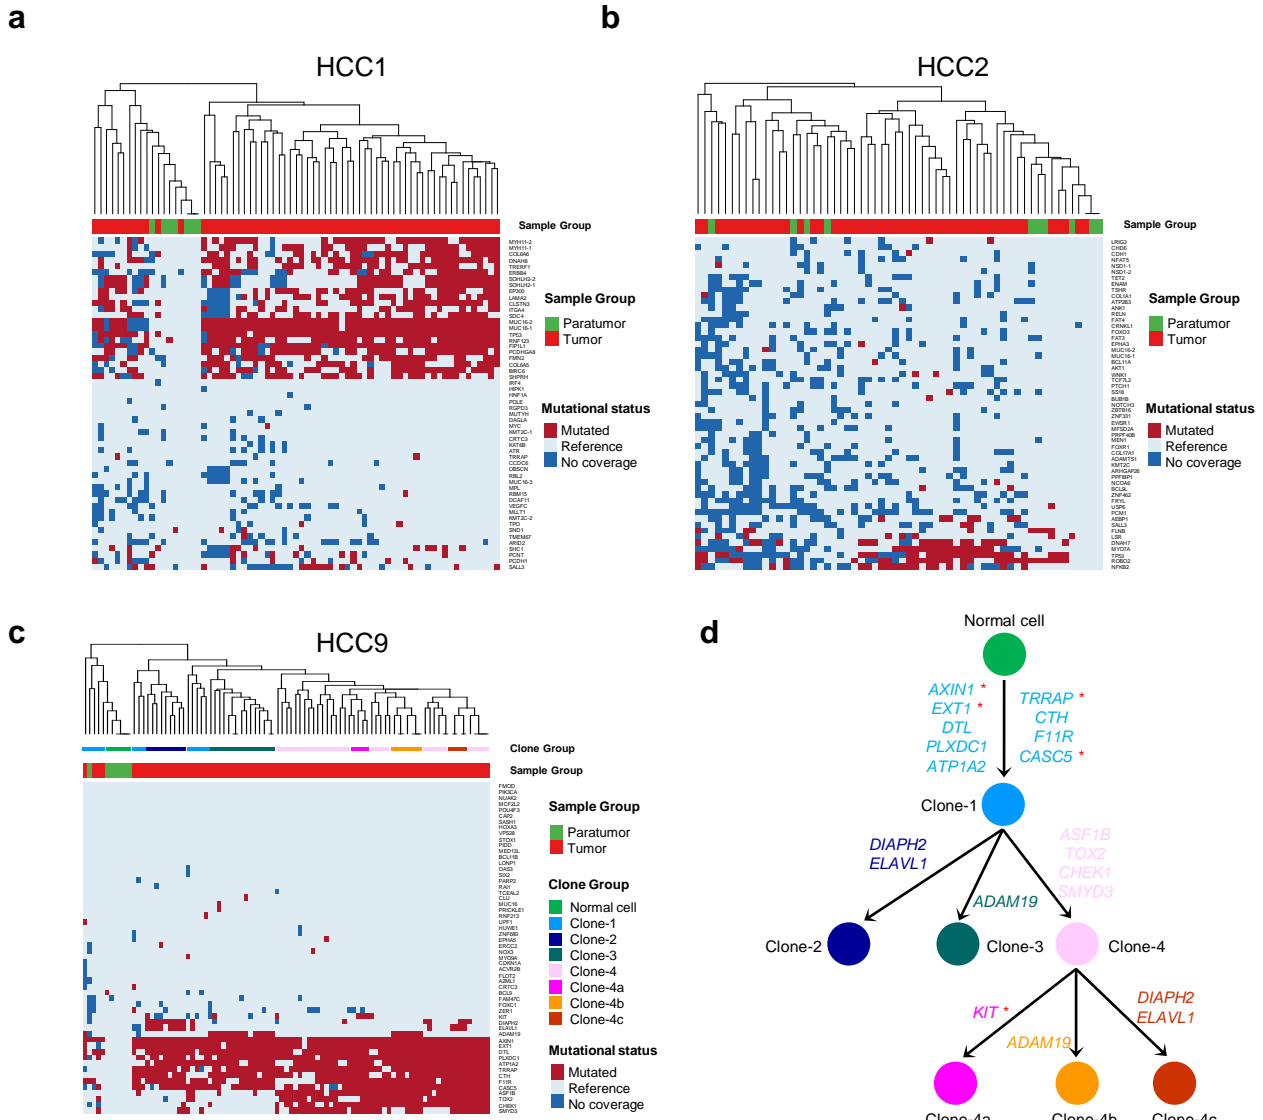

**Supplementary Fig. 4** Single-cell clonal structures of HCC1, HCC2 and HCC9 based on point mutations. **a-c** Mutational status of SNV/INDEL sites in single cells from both paratumor and tumor tissues in HCC1 (**a**), HCC2 (**b**) and HCC9 (**c**). The inferred clone groups in HCC9 were also annotated. **d** Clonal evolution in HCC9 with genes mutated at each step shown. \*: COSMIC Cancer Gene Census catalogued driver genes.

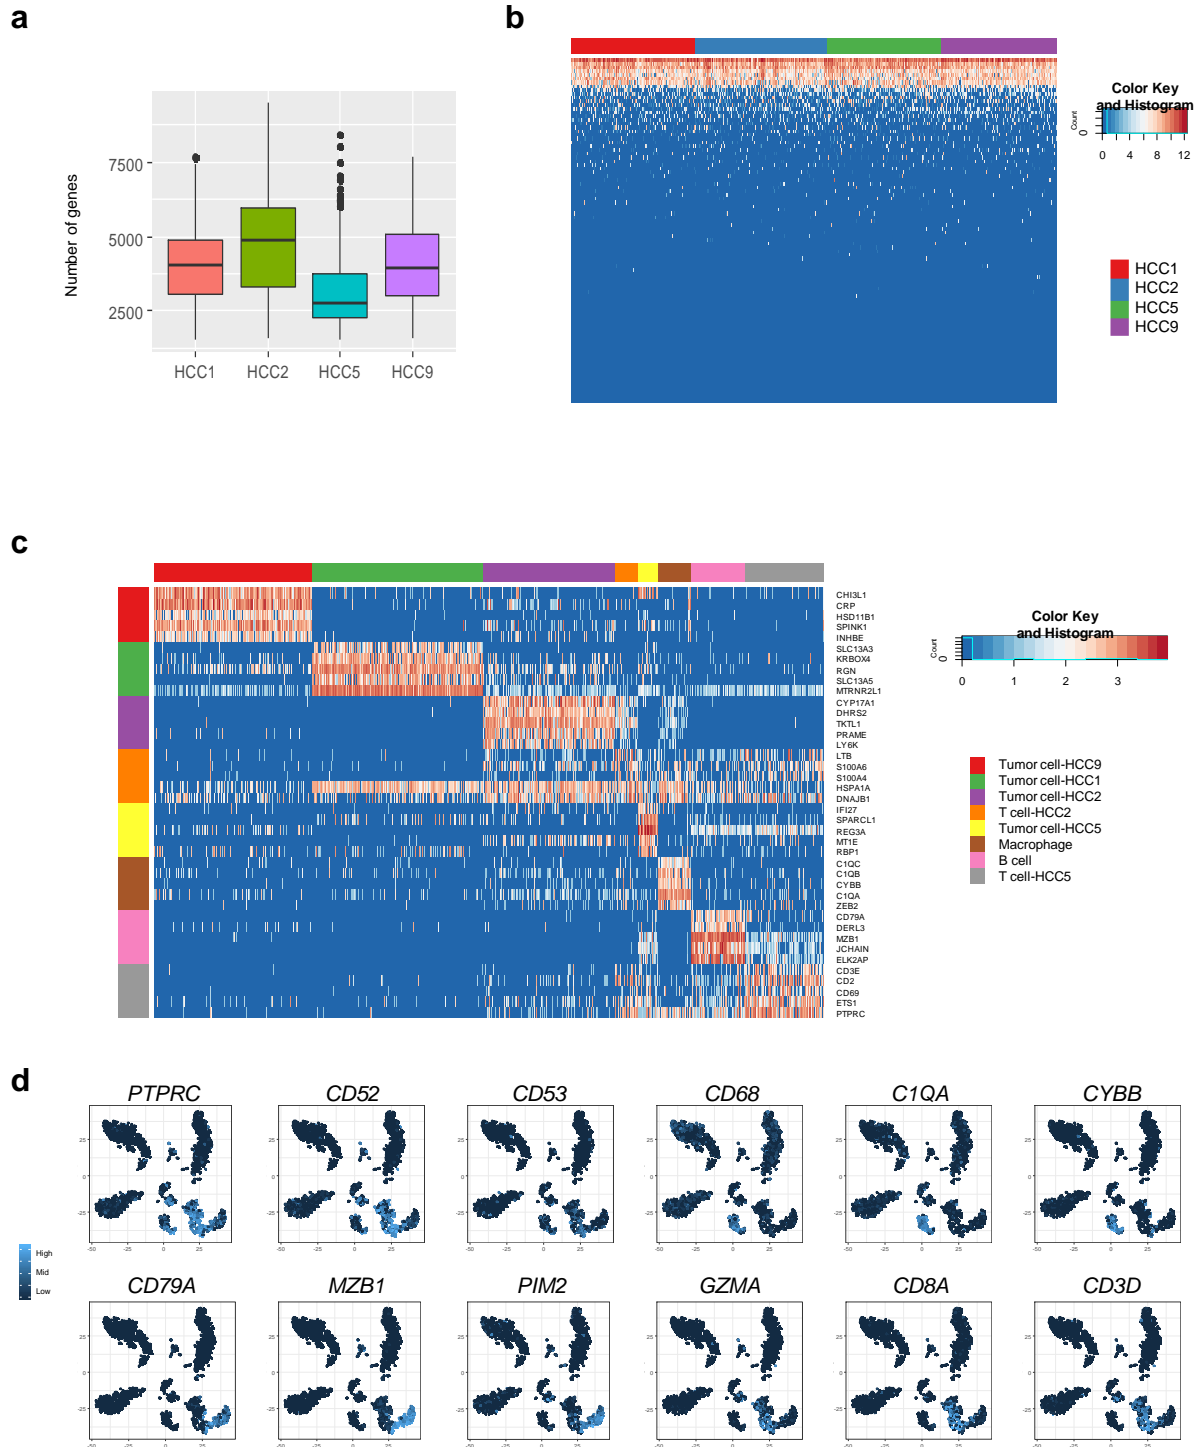

**Supplementary Fig. 5** scRNA-Seq revealed the constituent cell types of HCC. **a** Distribution of gene numbers detected in scRNA-Seq of each patient, with boxes showing median and 1<sup>st</sup> and 3<sup>rd</sup> quartiles, and whiskers showing 1.5 times of the inter-quartile range. **b** Heatmap showing the expression of ERCC RNA Spike-ins. Each row represented a spike-in, and each column represented a single cell. **c** Heatmap showing the genes specifically expressed in each cell cluster. **d** The expression pattern of representative immune markers.

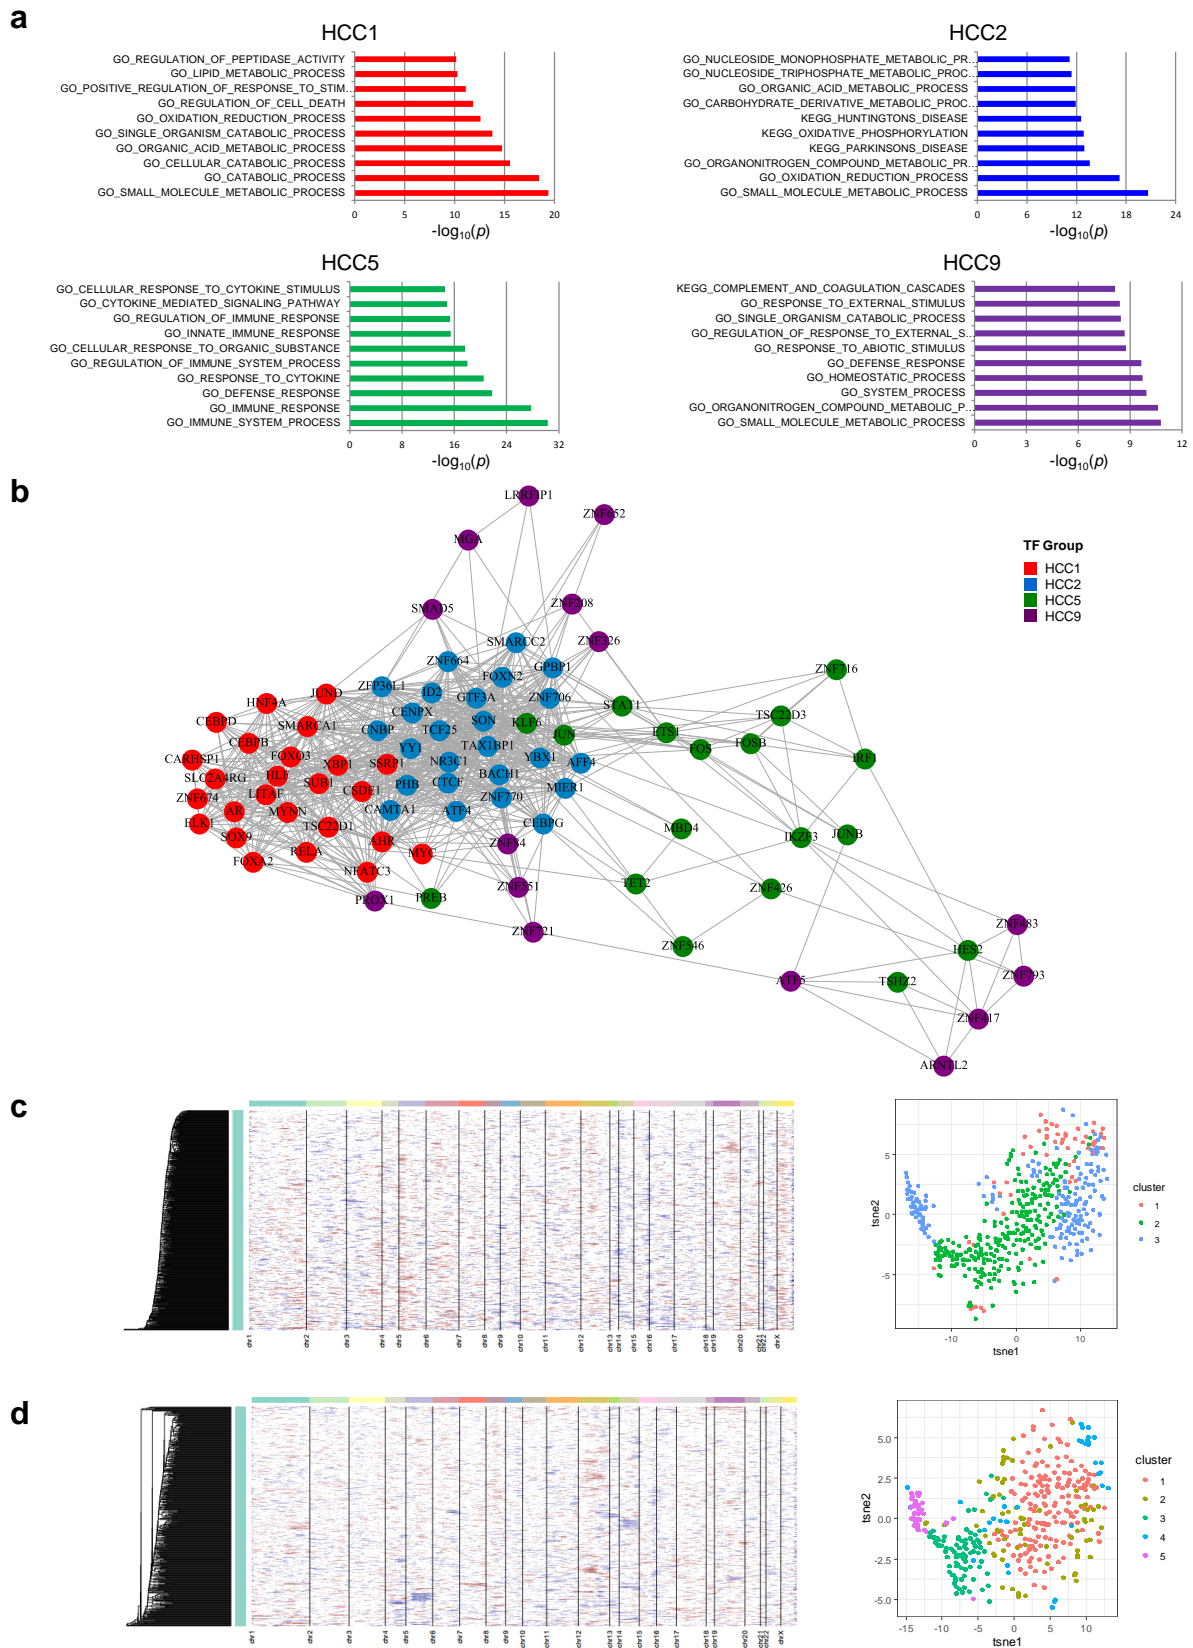

**Supplementary Fig. 6** scRNA-Seq revealed the inter-tumor and intra-tumor heterogeneity of HCC. **a** The top 10 GO enrichment items for the genes specifically expressed in each tumor cluster. **b** Transcriptional factor covariance network of the HCC scRNA-Seq data. **c,d** The copy number changes inferred from global transcriptomic profiles of single cells (*left*) and the sub-populations based on differentially expressed genes (*right*) from HCC1 (**c**) and HCC2 (**d**).

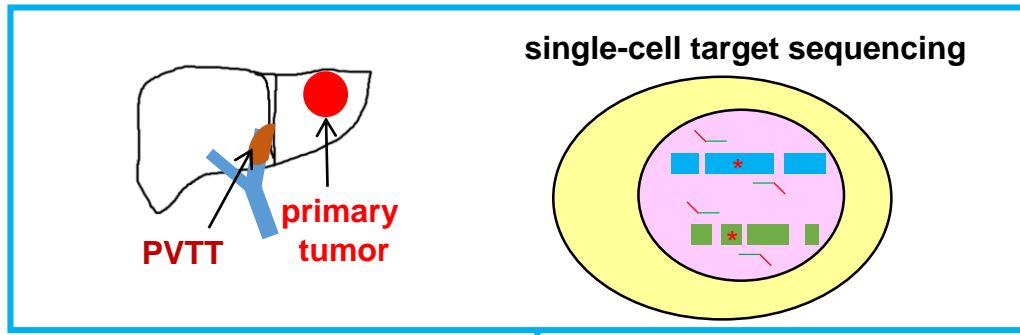

single-cell and single-variant clonal evolution

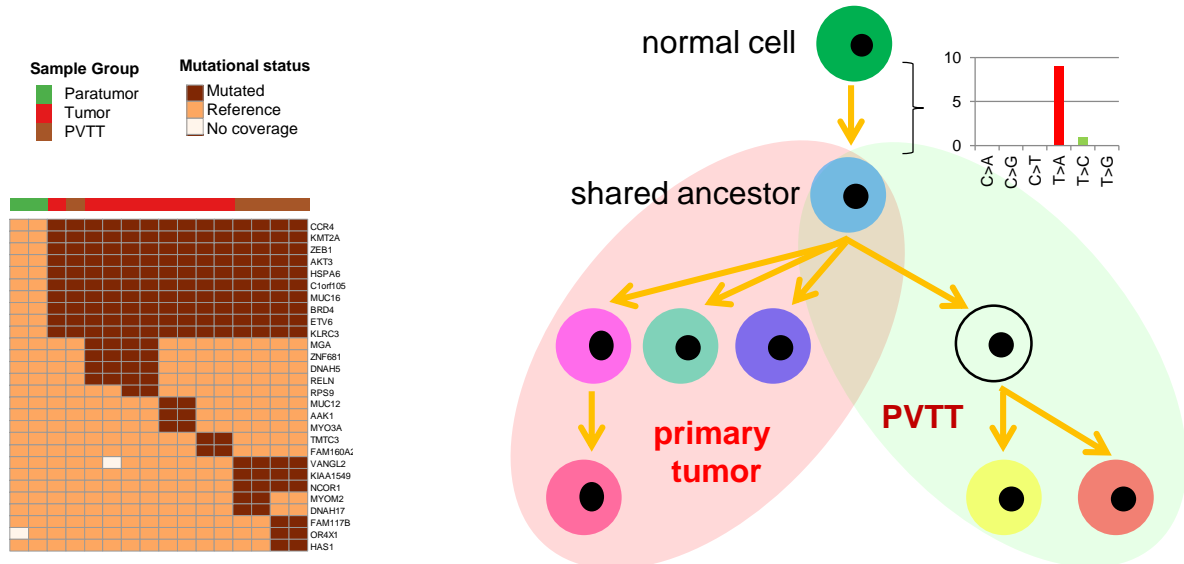

Supplementary Fig. 7 Schematic representation of major findings in this study.
